# Supplementary material for: Facile preparation of porous magnetic polydopamine microspheres through an inverse replication strategy for efficient enzyme immobilization
Source: Royal Society of Chemistry journal article supplement (doi:10.1039/c5tb01094b), 2015-01-01
Supplement: c5tb01094b1.pdf [file c5tb01094b1.pdf]

1 **Supporting information**

2 **Facile preparation of porous magnetic polydopamine microspheres through an**  
3 **inverse replication strategy for efficient enzyme immobilization**

4 Pingping Han <sup>a,b</sup>, Zhongyi Jiang <sup>a,b</sup>, Xiaoli Wang <sup>a,b</sup>, Xueyan Wang <sup>a,b</sup>, Shaohua Zhang <sup>a,b</sup>, Jiafu Shi <sup>b,c\*</sup>, Hong Wu  
5 <sup>a,b,d\*</sup>

6  
7 *(<sup>a</sup>Key Laboratory for Green Chemical Technology of Ministry of Education, School of Chemical*  
8 *Engineering and Technology, Tianjin University, Tianjin 300072, China*

9 *<sup>b</sup>Collaborative Innovation Center of Chemical Science and Engineering (Tianjin), Tianjin 300072,*  
10 *China*

11 *<sup>c</sup>School of Environment Science and Engineering, Tianjin University, Tianjin 300072, China*

12 *<sup>d</sup>Tianjin Key Laboratory of Membrane Science and Desalination Technology, Tianjin University,*  
13 *Tianjin 300072, China)*

14

1

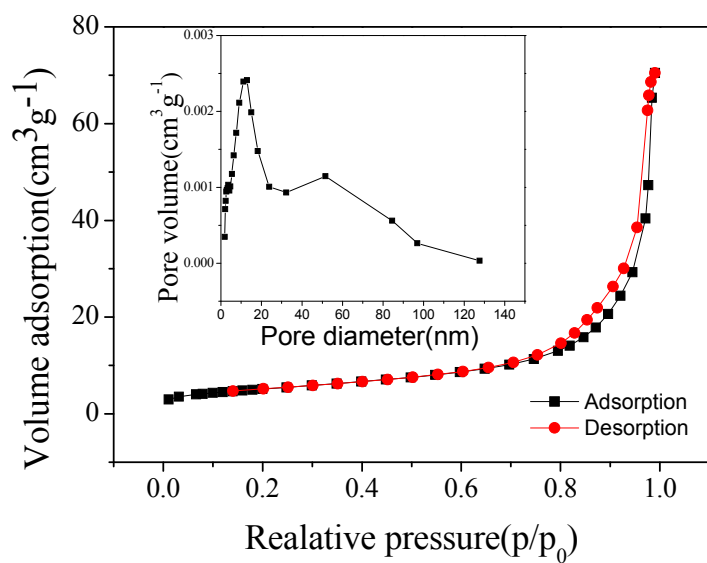

2

3 **Fig.S1.** Pore size distribution curve by the BJH method and nitrogen adsorption-desorption isotherm  
4 of Fe<sub>3</sub>O<sub>4</sub>@CaCO<sub>3</sub> microspheres with different diameters of 4.5 μm.

5

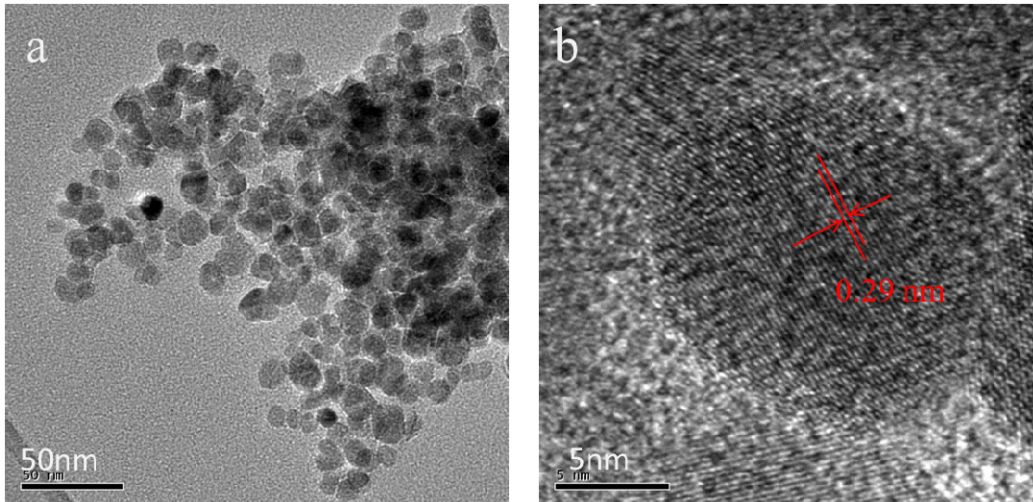

1  
2 **Fig.S2.** HRTEM images of Fe<sub>3</sub>O<sub>4</sub> nanoparticles. (Diameter: 10~20 nm.)  
3

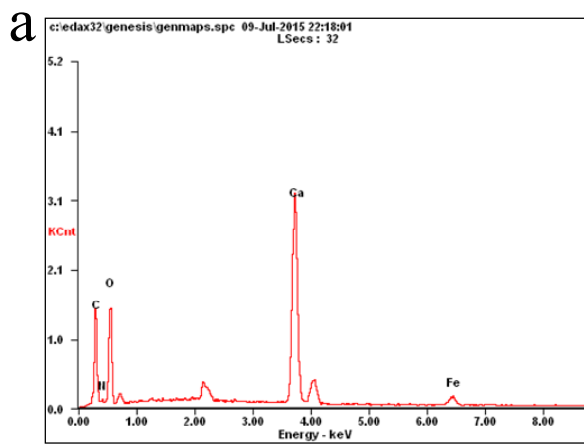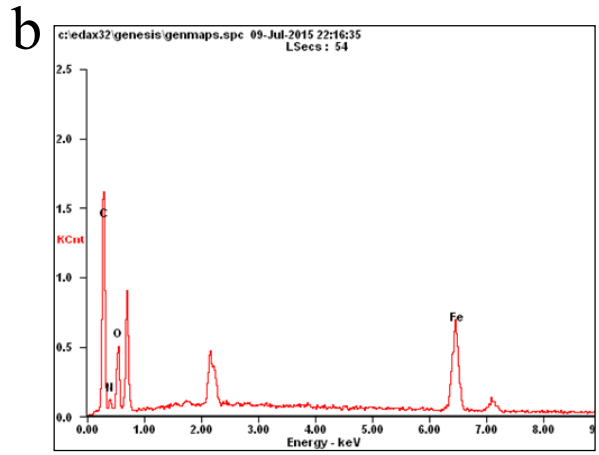

1

2 **Fig. S3.** EDS analysis of PMMSs (a) before and (b) after the template removal.

1 **Table S1.** The performance comparison for Fe<sub>3</sub>O<sub>4</sub>@CaCO<sub>3</sub> microspheres and PMMSs

|                                               | Fe <sub>3</sub> O <sub>4</sub> @CaCO <sub>3</sub> microspheres | 4.5 μm PMMSs |
|-----------------------------------------------|----------------------------------------------------------------|--------------|
| Immobilization efficiency (%)                 | 2.1±0.1                                                        | 74.9±2.5     |
| Loading capability (mg/g)                     | 9±0.5                                                          | 274.5±3.4    |
| Specific activity (U·mg <sup>-1</sup> enzyme) | 163.2±5.9                                                      | 162.3±5.2    |

2

3 In detail, the immobilization efficiency, loading capacity and specific activity for Fe<sub>3</sub>O<sub>4</sub>@CaCO<sub>3</sub>  
 4 microspheres were 2.1%, 9 mg/g and 163.2 U·mg<sup>-1</sup> enzyme, respectively. In comparison, the  
 5 immobilization efficiency and loading capacity of Fe<sub>3</sub>O<sub>4</sub>@CaCO<sub>3</sub> microspheres were lower than  
 6 those of PMMSs. This was probably owing to the rather weak interaction (physical adsorption)  
 7 between YADH and Fe<sub>3</sub>O<sub>4</sub>@CaCO<sub>3</sub> microspheres. Once conducting the reaction with an equal  
 8 amount of enzyme, the specific activity of Fe<sub>3</sub>O<sub>4</sub>@CaCO<sub>3</sub> microspheres (163.2 U·mg<sup>-1</sup> enzyme) was  
 9 nearly equal to that of PMMSs (162.3 U·mg<sup>-1</sup> enzyme).

10

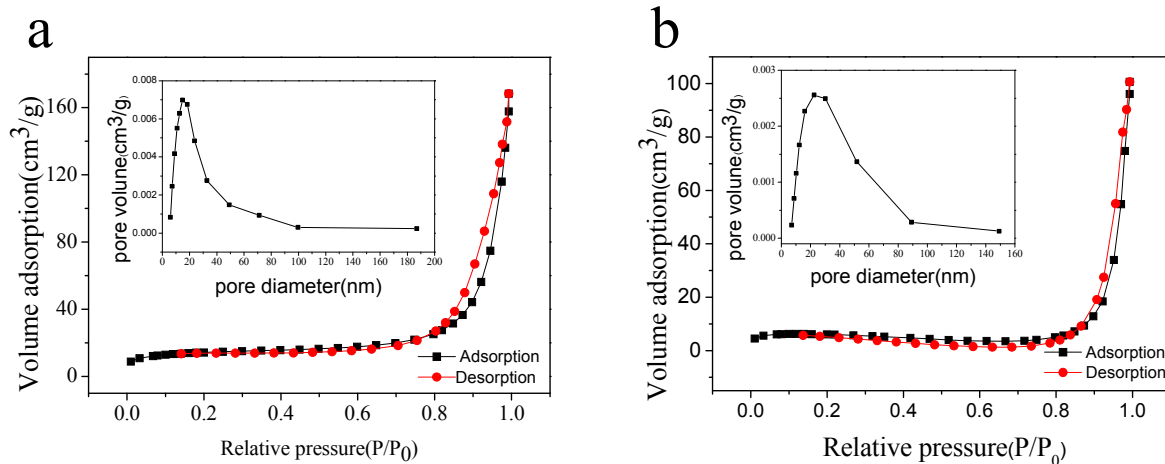

1

2 **Fig. S4.** Pore size distribution curve by the BJH method and nitrogen adsorption-desorption isotherm  
 3 of PMMSs with different diameters a) 4.5  $\mu\text{m}$  and b) 3.0  $\mu\text{m}$ .

4

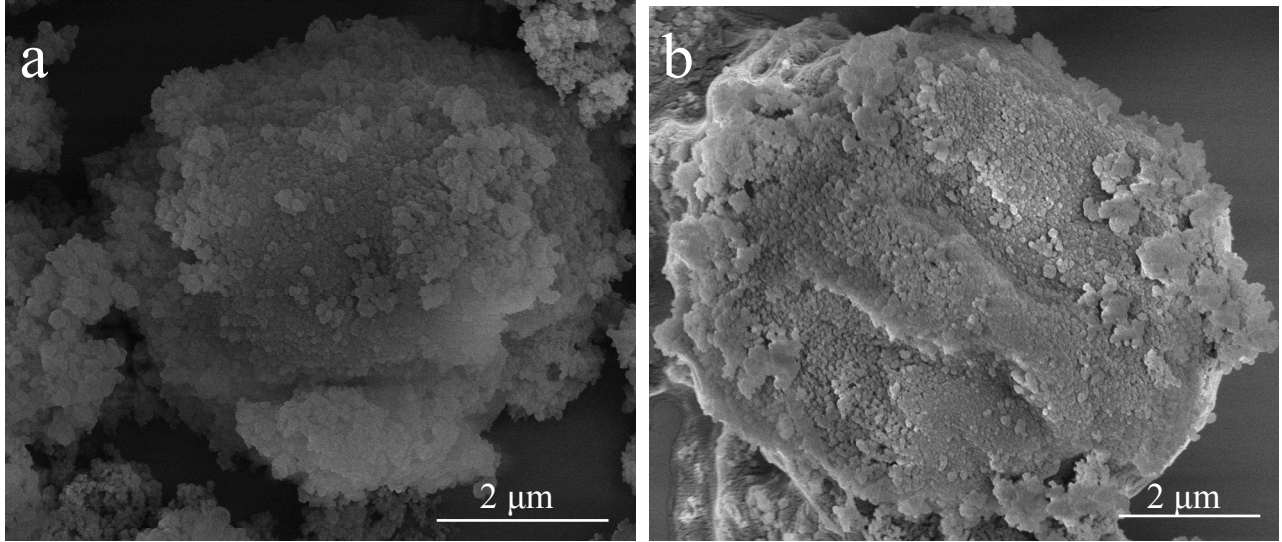

1

2 **Fig. S5.** SEM images of YADH immobilized PMMSs (a) before and (b) after reaction.

3

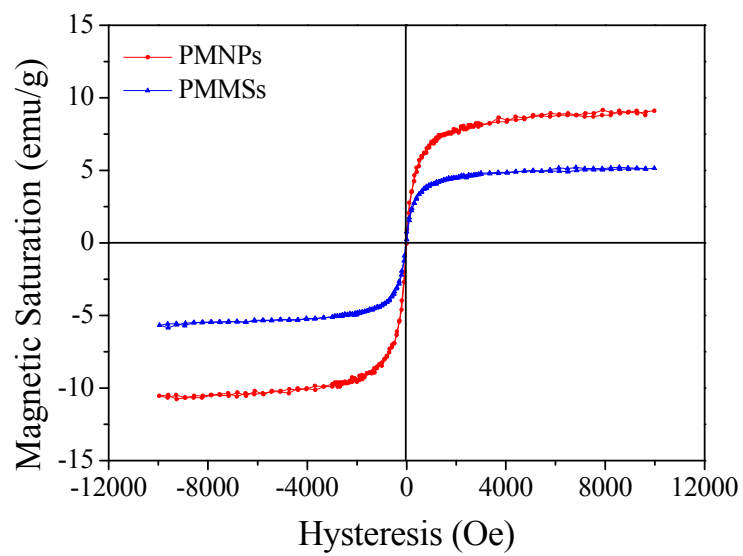

1

2 **Fig. S6.** Magnetic hysteresis loops of PMNPs and PMMSs.

3
